# Supplementary material for: Microbiota alteration is associated with the development of stress-induced despair behavior
Source: PubMed Central journal article supplement (PMC5339726; doi:10.1038/srep43859), 2017-03-07
Supplement: srep43859-s1.pdf [file srep43859-s1.pdf]

# **Microbiota alteration is associated with the development of stress-induced despair behavior**

Ioana A. Marin<sup>1,2,3</sup>, Jennifer E. Goertz<sup>1,3</sup>, Tiantian Ren<sup>4</sup>, Stephen S. Rich<sup>5</sup>, Suna Onengut-Gumuscu<sup>5</sup>, Emily Farber<sup>5</sup>, Martin Wu<sup>4</sup>, Christopher C. Overall<sup>1,2</sup>, Jonathan Kipnis<sup>1,2,3##\*</sup> and Alban Gaultier<sup>1,2,3##\*</sup>

<sup>1</sup>Center for Brain Immunology and Glia, <sup>2</sup>Department of Neuroscience, <sup>3</sup>Graduate Program in Neuroscience, School of Medicine, University of Virginia, Charlottesville, VA 22908, USA, <sup>4</sup>Department of Biology, University of Virginia, Charlottesville, VA 22904, USA, <sup>5</sup>Center for Public Health Genomics, University of Virginia, Charlottesville, VA 22908.

#Equally contributing senior authors

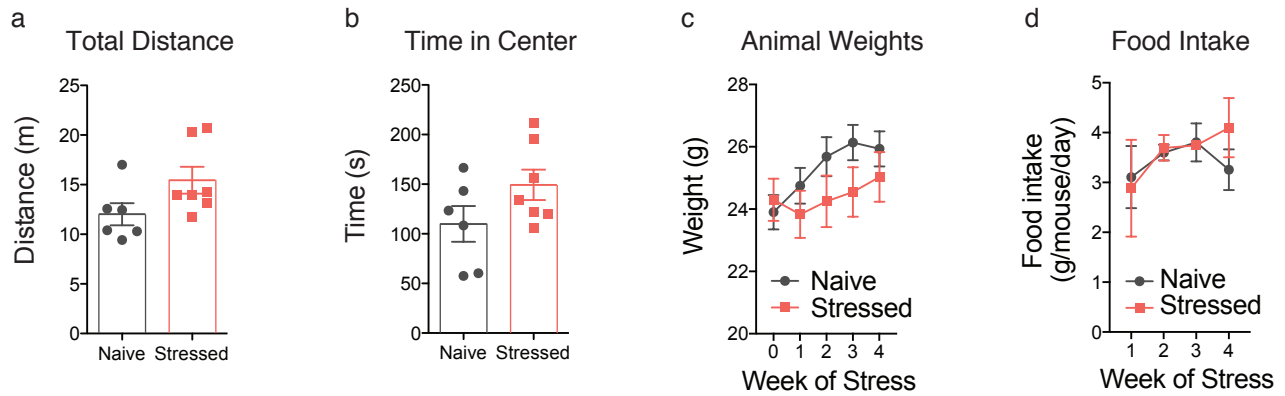

**Supplementary Figure 1.** Unpredictable chronic mild stress (UCMS) does not affect general activity. (a) Total distance transversed during the open field test (n = 6 naïve and 7 stressed; mean ± s.e.m). (b) Time spent in the center of the field during a 15 minute test (n = 6 naïve and 7 stressed; mean ± s.e.m). (c) Animal weights (n = 6 mice per group; 2-way ANOVA, no significant effect of stress; mean ± s.e.m). (d) Mean food intake (n = 4 per cage measurements, 2-way ANOVA, no significant effect of stress; mean ± s.e.m).

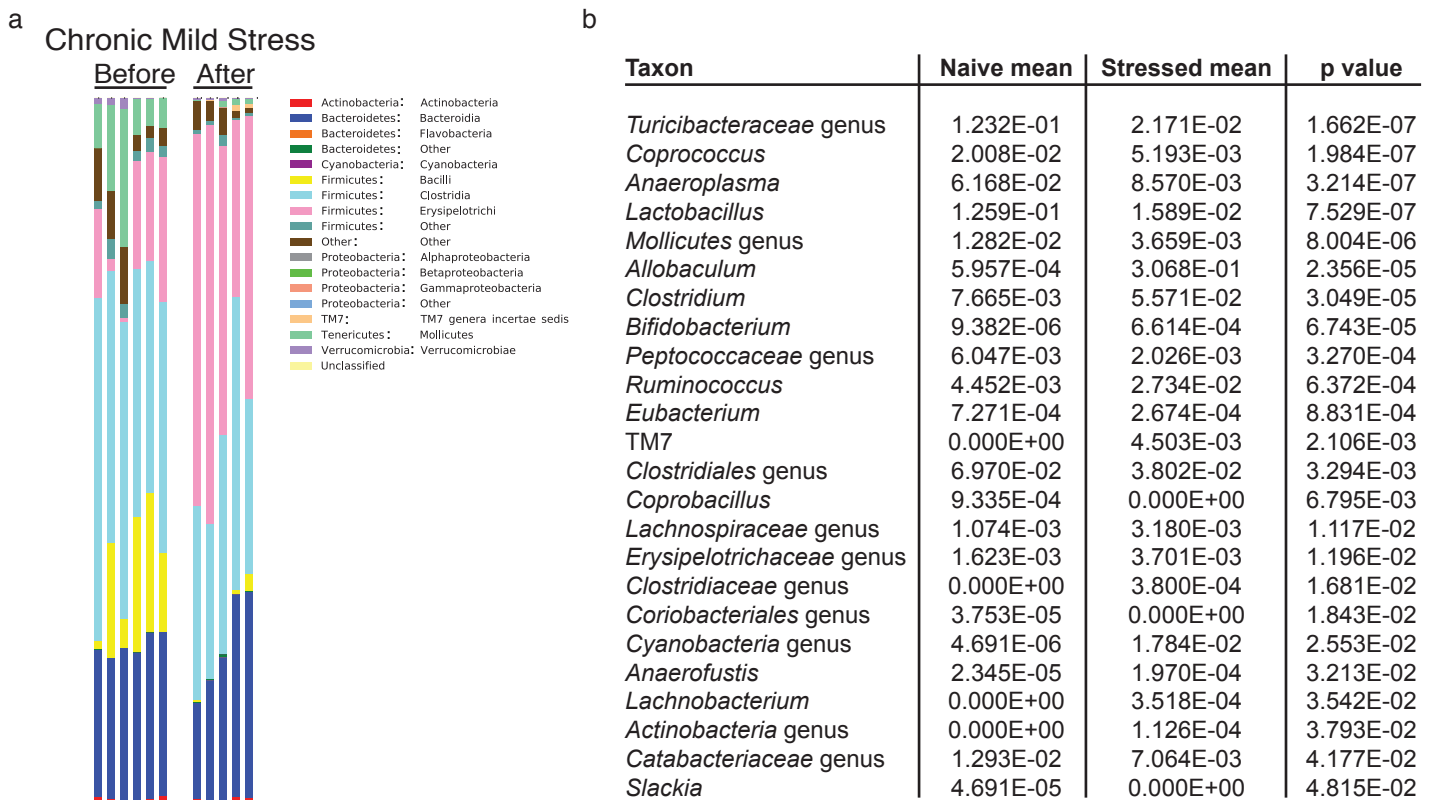

**Supplementary Figure 2.** Unpredictable chronic mild stress (UCMS) induces microbiota dysregulation. (a) Representative graphs of bacterial class distribution in individual subjects show a decrease in bacilli (yellow) in a different sequencing co-hort (n = 6 naïve and 5 stressed). (b) List of significant genera between naïve and stressed samples.

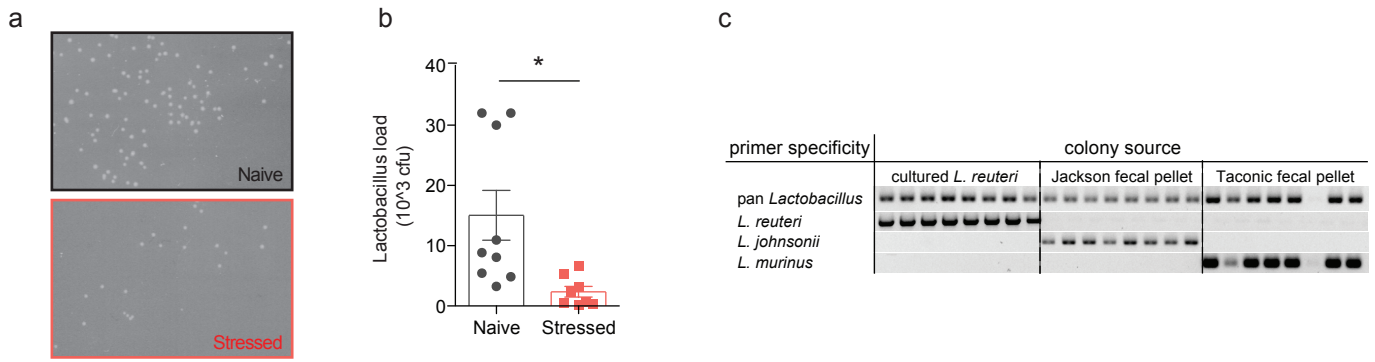

**Supplementary Figure 3.** Quantification of *Lactobacillus* by selective culture. (a) Representative images of *Lactobacillus* colonies from naive and stressed mice. (b) Quantification of colonies obtained from fecal samples of naive and stressed mice ( $n = 9$  naive and  $8$  stressed, representative of 2 independent experiments; two-tailed t-test with Welch's correction,  $*p < 0.05$ ; mean  $\pm$  s.e.m). (c) PCR verification of *Lactobacillus* colonies obtained by selective culture from fecal samples, with *L.reuteri* colonies as controls.

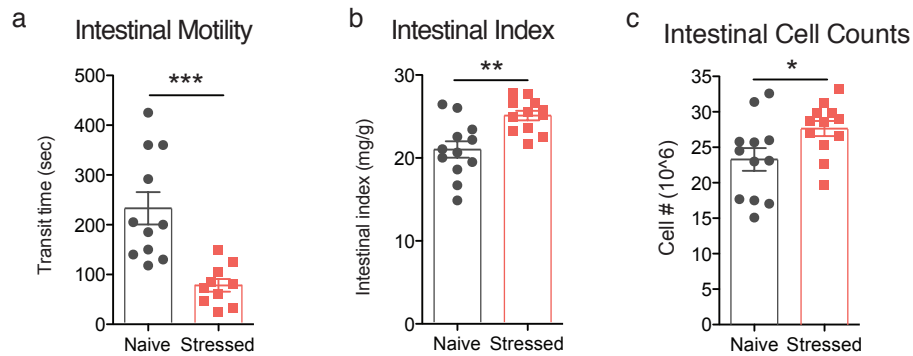

**Supplementary Figure 4.** Stressed mice show signs of altered intestinal physiology. (a) Intestinal motility of naive and stressed mice ( $n = 11$  naive and  $10$  stressed mice per group; two-tailed t-test with Welch's correction;  $***p < 0.001$ ; mean  $\pm$  s.e.m). (b) Small intestine index, relative to body weight ( $n = 12$  mice per group, two-tailed t-test;  $**p < 0.01$ ; mean  $\pm$  s.e.m). (c) Total intestinal cell numbers ( $n = 12$  mice per group, two-tailed t-test;  $*p < 0.05$ ; mean  $\pm$  s.e.m).

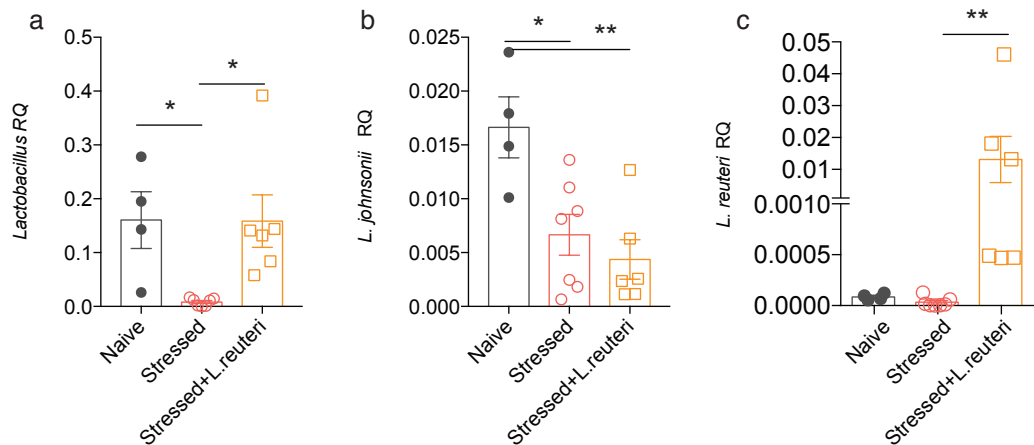

**Supplementary Figure 5.** Quantification of *Lactobacillus* species. (a) Quantification of total fecal *Lactobacillus* levels after stress and *L. reuteri* supplementation ( $n = 4-6$  animals per group; one-way ANOVA with Tuckey's multiple comparisons,  $*p < 0.05$ ; mean  $\pm$  s.e.m). (b) Quantification of fecal *L. johnsonii* levels after stress and *L. reuteri* supplementation ( $n = 4-6$  animals per group; one-way ANOVA with Tuckey's multiple comparisons,  $*p < 0.05$ ,  $**p < 0.01$ ; mean  $\pm$  s.e.m). (c) Quantification of fecal *L. reuteri* levels after stress and *L. reuteri* supplementation ( $n = 4-6$  animals per group; Kruskal-Wallis test with Dunn's multiple comparisons,  $**p < 0.01$ ; mean  $\pm$  s.e.m).

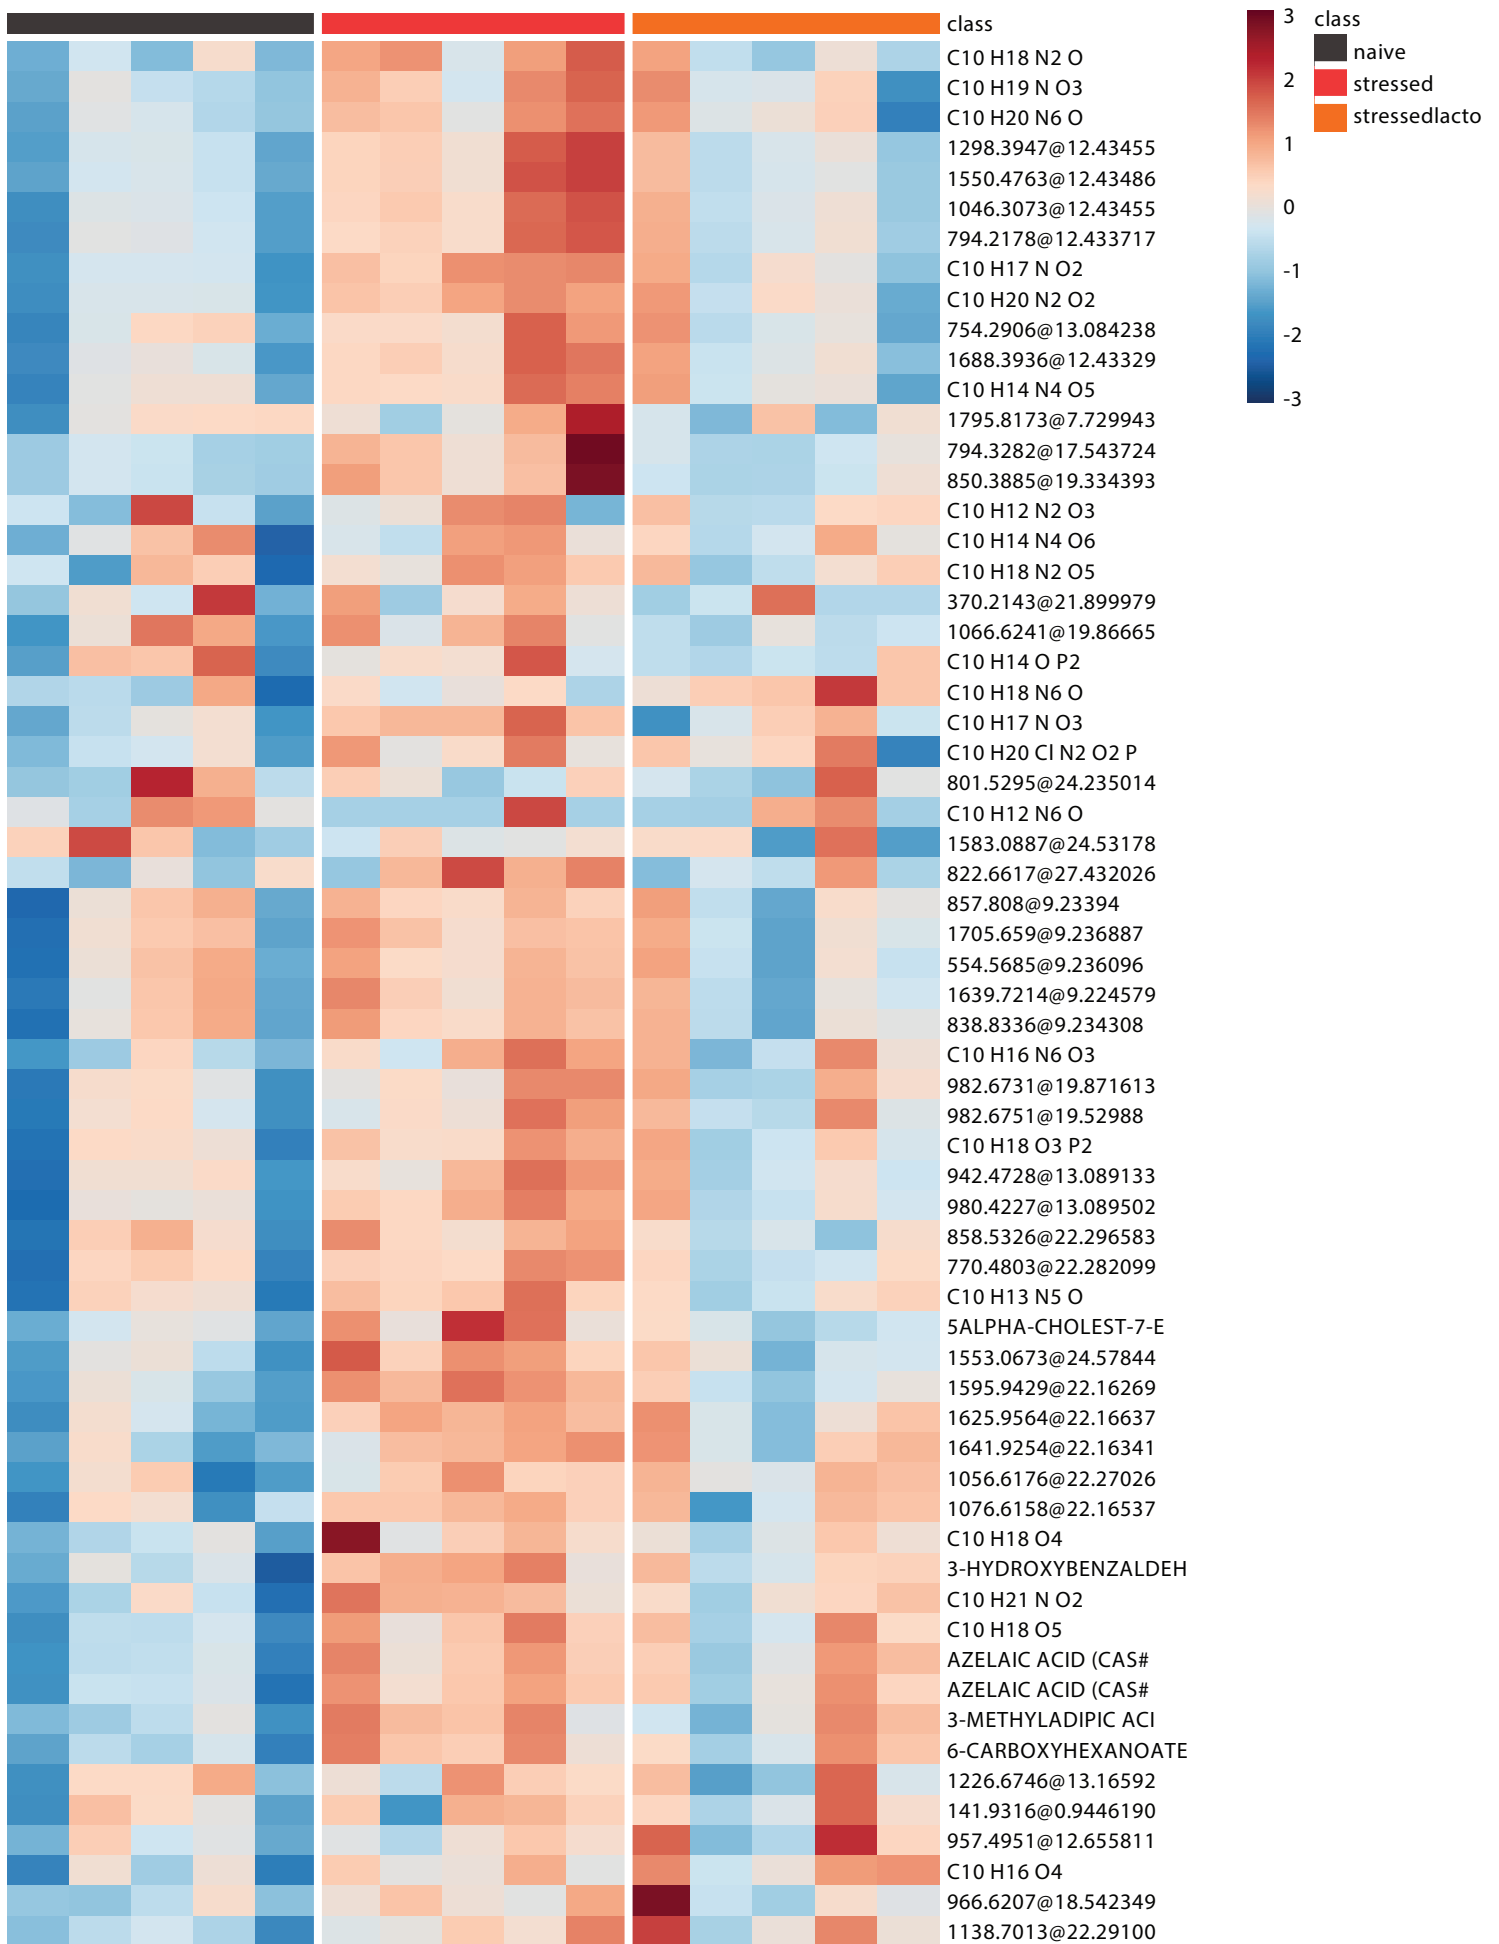

**Supplementary Figure 6:** Representative heatmap of top significant metabolites  
 Top 63 most significant metabolites represented using heat-map analysis.

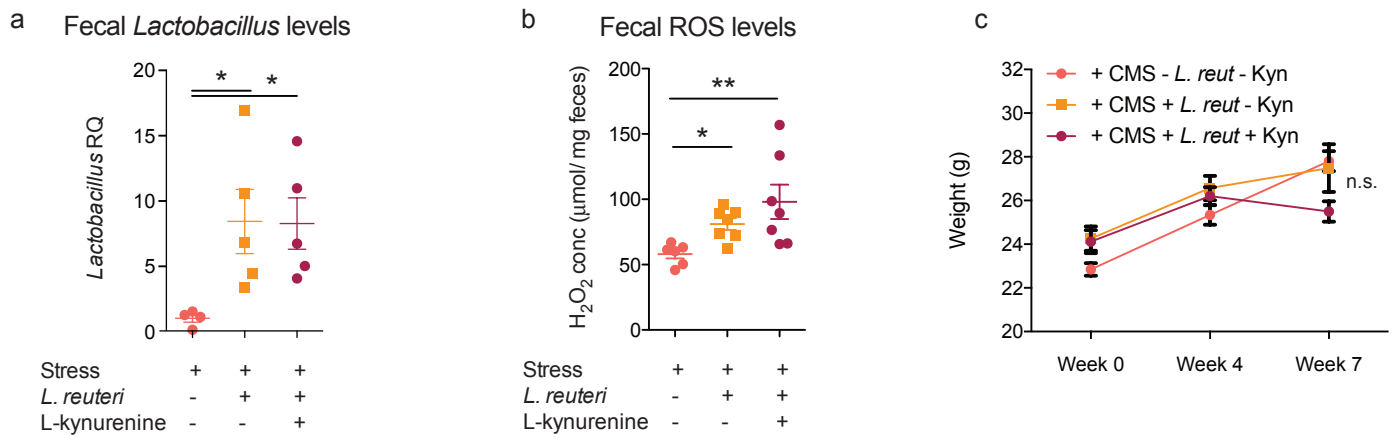

**Supplementary Figure 7.** *Lactobacillus* treatment elevates fecal *Lactobacillus* and ROS levels regardless of kynurenine levels. (a) Quantification of fecal *Lactobacillus* levels after *L. reuteri* supplementation and kynurenine treatment (n = 4-5 animals per group; modified one-way ANOVA with Dunn's multiple comparisons, \*p < 0.05; mean ± s.e.m) (b) Quantification of fecal H<sub>2</sub>O<sub>2</sub> levels after *L. reuteri* supplementation and kynurenine treatment (n = 6-7 animals per group; modified one-way ANOVA with Dunn's multiple comparisons, \*p < 0.05, \*\*p < 0.001; mean ± s.e.m). (c) Animal weights at key treatment timepoints (n = 6-7 animals per group, 2-way ANOVA, no significant effect of treatment; mean ± s.e.m).

| Name                                               | Forward seq                                                | Reverse seq                                                     |
|----------------------------------------------------|------------------------------------------------------------|-----------------------------------------------------------------|
| 16S for library with adapters (per Illumina guide) | TCGTCGGCAGCGTCAGATGTGTA<br>TAAGAGACAGCCTACGGGNGGCW<br>GCAG | GTCTCGTGGGCTCGGAGATGTGTA<br>TAAGAGACAGGACTACHVGGGTATC<br>TAATCC |
| 16S <sup>1</sup>                                   | CCTACGGGDGGCWGCA                                           | GGACTACHVGGGTMTCTAATC                                           |
| <i>Lactobacillus</i> <sup>2</sup>                  | TGGATGCCTTGGCACTAGGA                                       | AAATCTCCGGATCAAAGCTTACTTAT                                      |
| SFB <sup>3</sup>                                   | GACGCTGAGGCATGAGAGCAT                                      | GACGGCACGGATTGTTATTCA                                           |
| <i>L. reuteri</i> <sup>4</sup>                     | ACCTGATTGACGATGGATCACCAGT                                  | CCACCTTCCTCCGGTTTGTCA                                           |
| <i>L. johnsonii</i> <sup>5</sup>                   | GAGCTTGCCTAGATGATTTTA                                      | ACTACCAGGGTATCTAATCC                                            |
| <i>L. murinus</i> <sup>6</sup>                     | GCAATGATGCGTAGCCGAAC                                       | GCACTTTCTTCTCTAACAACAGGG                                        |
| ido1v1 <sup>7</sup>                                | TGAAGATGTGGGCTTTGCTCT                                      | TGTGGGCAGCTTTTCAACTTC                                           |

**Supplementary Table 1.** Primer sequences  
List of primer sequences used in the study.

## SUPPLEMENTAL REFERENCES

1. Liu CM, Aziz M, Kachur S, Hsueh PR, Huang YT, Keim P et al. BactQuant: an enhanced broad-coverage bacterial quantitative real-time PCR assay. *BMC microbiology* 2012; 12: 56.
2. Haarman M, Knol J. Quantitative real-time PCR analysis of fecal *Lactobacillus* species in infants receiving a prebiotic infant formula. *Appl Environ Microb* 2006; 72(4): 2359-2365.
3. Ivanov, II, Atarashi K, Manel N, Brodie EL, Shima T, Karaoz U et al. Induction of intestinal Th17 cells by segmented filamentous bacteria. *Cell* 2009; 139(3): 485-498.
4. Kwon HS, Yang EH, Yeon SW, Kang BH, Kim TY. Rapid identification of probiotic *Lactobacillus* species by multiplex PCR using species-specific primers based on the region extending from 16S rRNA through 23S rRNA. *Fems Microbiol Lett* 2004; 239(2): 267-275.
5. Walter J, Tannock GW, Tilsala-Timisjarvi A, Rodtong S, Loach DM, Munro K, Alatossava T. Detection and Identification of Gastrointestinal *Lactobacillus* Species by Using Denaturing Gradient Gel Electrophoresis and Species-Specific PCR Primers. *Appl Environ Microbiol.* 2000; 66(1): 297-303.
6. Harley IT, Giles DA, Pfluger PT, Burgess SL, Walters S, Hembree J, Raver C, Rewerts CL, Downey J, Flick LM, Stankiewicz TE, McAlees JW, Wills-Karp M, Balfour Sartor R, Divanovic S, Tschöp MH, Karp CL. Differential colonization with segmented filamentous bacteria and *Lactobacillus murinus* do not drive divergent development of diet-induced obesity in C57BL/6 mice. *Mol Metab* 2013. 10;2(3):171-83.
7. Agudelo LZ, Femenia T, Orhan F, Porsmyr-Palmertz M, Goiny M, Martinez-Redondo V et al. Skeletal muscle PGC-1 $\alpha$ 1 modulates kynurenine metabolism and mediates resilience to stress-induced depression. *Cell* 2014; 159(1): 33-45.
